# Supplementary material for: The Hippo Coactivator YAP1 Mediates EGFR Overexpression and Confers Chemoresistance in Esophageal Cancer
Source: Oxford University Press journal article supplement (doi:10.1158/1078-0432.ccr-14-2191), 2015-03-04
Supplement: 10780432ccr142191-sup-136785_1_supp_2808322_nhq7d9.docx [file 10780432ccr142191-sup-136785_1_supp_2808322_nhq7d9.docx]

**Supplemental Figure 1. YAP mediates constitutive chemoresistance in EC cells**

**A**.Immunoblotting for YAP and EGFR was performed in SKGT-4 and KATO-TN cells (top panel). Matrigel-invasion assays were performed in SKGT-4 and KATO-TN cell as indicated in Materials and Methods. Representative fields are shown in low panel. **B&C.** SKGT-4 and KATO-TN cells were treated with 5-FU at the dosage indicated (M) for different days and cell growth was determined using MTS as indicated in Materials and Methods.

**Supplemental Figure 2. Knock down EGFR in induced YAP1 overexpressed EC cells significantly reduced EC cell growth.**

SKGT-4 (PIN20YAP1) cells with YAP1 induction (DOX+) were further knock down EGFR level using Lenti-Crisp system (TOP), these cells then treated with 5-FU at different dosage as indicated for 72 hours. Cell growth was determined using MTS. Data are represented as mean and SD from three experiments.**p<0.01.

**Supplemental Figure 3. Effect of the combination of YAP1 inhibitor VP, EGFR inhibitor Erlotinib and 5-FU on EC cell growth**

JHESO cells were treated with VP, Erlotinib, 5-FU either alone or in combination at the dosage and the combination indicated, cell growth was determined using MTS. Data are represented as mean and SD from three experiments.**p<0.01;***p<0.001.

**Supplemental Figure 3. Knock down EGFR in induced YAP1 overexpressed EC cells significantly reduced EC cell growth.**

SKGT-4 (PIN20YAP1) cells with YAP1 induction (DOX+) were further knock down EGFR level using Lenti-Crisp system (TOP), these cells then treated with 5-FU at different dosage as indicated for 72 hours. Cell growth was determined using MTS. Data are represented as mean and SD from three experiments.**p<0.01.

**Supplemental Figure 4. Level of YAP1, EGFR and KI67 in mice tumors was dramatically diminished by the combination treatment of VP and 5-FU.**

Tumor tissues from four group of xenograft mouse model were examined the level of YAP1 (1:100), EGFR(1:100) and KI67(1:100) by immunohistochemistry using their specific antibodies as described in materials&Methords. Representative images (200x) for the different group (vertical) and different markers (YAP1, EGFR and Ki67) are shown.
